# Supplementary material for: Synthesis and material characterization of amorphous and crystalline (α-) Al2O3via aerosol assisted chemical vapour deposition
Source: Royal Society of Chemistry journal article supplement (doi:10.1039/c6ra24018f), 2016-01-01
Supplement: c6ra24018f1.pdf [file c6ra24018f1.pdf]

**Synthesis and material characterization of amorphous and crystalline ( $\alpha$ -)  $\text{Al}_2\text{O}_3$   
*via* aerosol assisted chemical vapour deposition.**

Sapna D. Ponja<sup>a</sup>, Ivan P. Parkin<sup>a</sup> and Claire J. Carmalt<sup>a\*</sup>

\*Corresponding author

<sup>a</sup>Materials Chemistry Centre, Department of Chemistry, University College London,  
20 Gordon Street, London WC1H 0AJ, UK

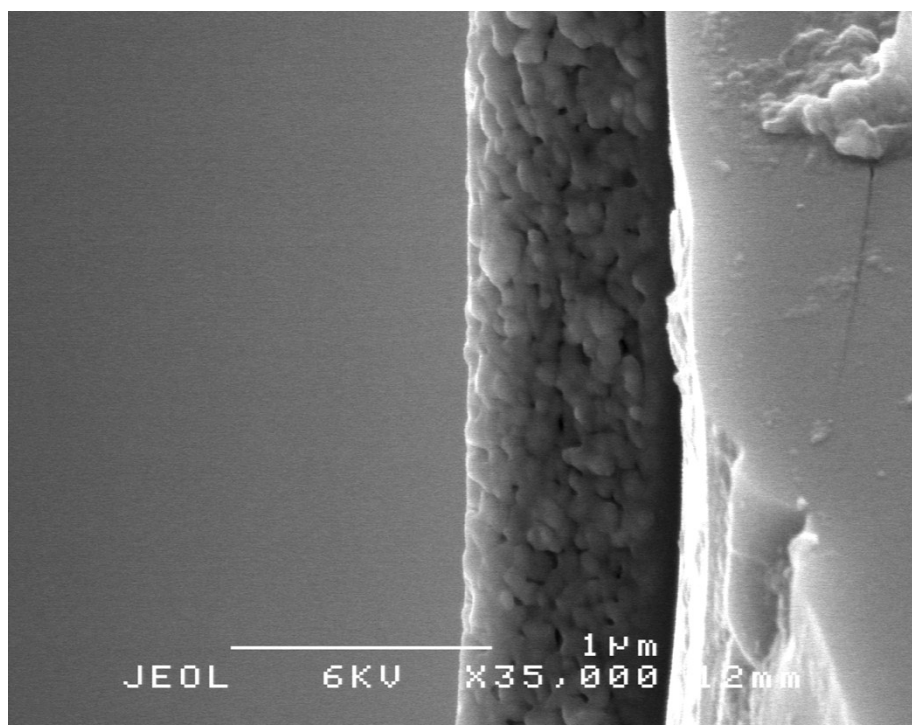

**Figure 1:** Cross sectional scanning electron micrograph of  $\text{Al}_2\text{O}_3$  film showing a thickness of ca. 750 nm.
